# Supplementary material for: Photoetching of Immobilized --PVC Composite for Improved Photocatalytic Activity
Source: Hindawi journal article supplement (doi:10.1155/2012/859294), 2012-01-01
Supplement: f1 [file 859294.f1.docx]

**SUPPLEMENTARY DATA**

**SUPPLEMENTARY TABLE 1**: Thermogravimetric data of ENR50, PVC, the non-etched and photo-etched TiO2-ENR50-PVC composite

___________________________________________________________________________

Samples ENR50 PVC Non-etched Etched

TiO2 compositeTiO2composite

___________________________________________________________________________

First stage

Peak temperature, °C (T1max) 400 300 290 320

Wt. loss (%) 98.56 60.54 4.73 1.70

Second stage

Peak temperature, °C (T2max) 460 340

Wt. loss (%) 26.64 1.84

Third stage

Peak temperature, °C (T3max) 420

Wt. loss (%) 3.33

___________________________________________________________________________

**SUPPLEMENTARY FIGURE 1**

**SUPPLEMENTARY FIGURE 1**: Photocatalytic decolourization of MB by TiO2 powder (square) and photo-etched TiO2-ENR50-PVC composite (diamond)
